1                   **Relevance of coral geometry in the outcomes of the coral-algal benthic war**

2  
3 Emma E. George<sup>1,2</sup>, James Mullinix<sup>3,4,5</sup>, Fanwei Meng<sup>3</sup>, Barbara Bailey<sup>3,5</sup>, Clinton Edwards<sup>6</sup>,  
4 Ben Felts<sup>3,5</sup>, Andreas Haas<sup>7</sup>, Aaron C. Hartmann<sup>1,8</sup>, Benjamin Mueller<sup>9,10</sup>, Jim Nulton<sup>3,5</sup>, Ty N.F.  
5 Roach<sup>1,5</sup>, Peter Salamon<sup>3,5</sup>, Cynthia B. Silveira<sup>1,5</sup>, Mark J.A. Vermeij<sup>9,10</sup>, Forest L. Rohwer<sup>1,5</sup>,  
6 Antoni Luque\*<sup>3,4,5</sup>

7  
8  
9  
10  
11  
12  
13 <sup>1</sup>Department of Biology, San Diego State University, San Diego, CA, USA

14 <sup>2</sup>Department of Botany, University of British Columbia, Vancouver, BC, Canada

15 <sup>3</sup>Department of Mathematics and Statistics, San Diego State University, San Diego, CA, USA

16 <sup>4</sup>Computational Science Research Center, San Diego State University, San Diego, CA, USA

17 <sup>5</sup>Viral Information Institute, San Diego State University, San Diego, CA, USA

18 <sup>6</sup>Scripps Institution of Oceanography, University of California San Diego, San Diego, CA, USA

19 <sup>7</sup>NIOZ Royal Netherlands Institute for Sea Research and Utrecht University, Texel, Netherlands

20 <sup>8</sup>Smithsonian National Museum of Natural History, Washington, DC, USA

21 <sup>9</sup>CARMABI Foundation, Willemstad, Curaçao

22 <sup>10</sup>Department of Freshwater and Marine Ecology/Institute for Biodiversity and Ecosystem  
23 Dynamics, University of Amsterdam, Amsterdam, The Netherlands

24  
25  
26  
27  
28  
29  
30  
31  
32 \*Corresponding author: Antoni Luque

33 Department of Mathematics and Statistics, GMCS 512

34 San Diego State University

35 5500 Campanile Dr.

36 San Diego, CA 92182-4614

37 Phone: 619-594-1336

38 Fax: 619-594-5676

39 Email: [aluque@mail.sdsu.edu](mailto:aluque@mail.sdsu.edu)

40 **Abstract:** Corals have built reefs on the benthos for millennia, becoming an essential element in  
41 marine ecosystems. Climate change and human impact, however, are favoring the invasion of  
42 non-calcifying benthic algae and reducing coral coverage. Corals rely on energy derived from  
43 photosynthesis and heterotrophic feeding, which depends on their surface area, to defend their  
44 outer perimeter. But the relation between geometric properties of corals and the outcome of  
45 competitive coral-algal interactions is not well known. To address this, 50 coral colonies  
46 interacting with algae were sampled in the Caribbean island of Curaçao. 3D and 2D digital  
47 models of corals were reconstructed to measure their surface area, perimeter, and polyp sizes. A  
48 box counting algorithm was applied to calculate their fractal dimension. The perimeter and  
49 surface dimensions were statistically non-fractal, but differences in the mean surface fractal  
50 dimension captured relevant features in the structure of corals. The mean fractal dimension and  
51 surface area were negatively correlated with the percentage of losing perimeter and positively  
52 correlated with the percentage of winning perimeter. The combination of coral perimeter, mean  
53 surface fractal dimension, and coral species explained 19% of the variability of losing regions,  
54 while the surface area, perimeter, and perimeter-to-surface area ratio explained 27% of the  
55 variability of winning regions. Corals with surface fractal dimensions smaller than two and small  
56 perimeters displayed the highest percentage of losing perimeter, while corals with large surface  
57 areas and low perimeter-to-surface ratios displayed the largest percentage of winning perimeter.  
58 This study confirms the importance of fractal surface dimension, surface area, and perimeter of  
59 corals in coral-algal interactions. In combination with non-geometrical measurements such as  
60 microbial composition, this approach could facilitate environmental conservation and restoration  
61 efforts on coral reefs.

62

63

## 64 INTRODUCTION

65 Corals use energy derived from photosynthesis and heterotrophic feeding to build reefs. This has  
66 enabled corals to dominate the battle for light and space on the reef benthos for millennia  
67 (Kaandorp & Kubler, 2001). However, the combination of overharvesting of herbivorous fish,  
68 increased nutrient runoff from land (eutrophication), and ocean warming is stimulating the  
69 growth of non-calcifying algae at the expense of corals world-wide (Alevizon & Porter, 2015).  
70 The increase in algal coverage is re-routing the energy to alternative trophic pathways that are  
71 enhancing the dominance of algae through positive feedback loops, for example, invigorating the  
72 growth of opportunistic and virulent microbes at the coral-algal interface (Kline et al., 2006;  
73 Smith et al., 2006; Dinsdale & Rohwer, 2011, Silveira et al. 2015). As algal density increases on  
74 reefs, competitive coral-algal interactions are becoming more frequent (Barott et al., 2012a,b;  
75 Dinsdale & Rohwer, 2011; Haas et al., 2011), and, in order to preserve and restore coral reefs, it  
76 is crucial to understand the key factors that determine the outcomes of these interactions.

77 While there has been significant study into the effects of nitrification and changes in  
78 herbivore biomass on coral-algal interactions, results have been somewhat equivocal (Smith et  
79 al. 2001, McCook et al. 2001, Burkepile et al. 2006, Rasher et al. 2012). This suggests that other  
80 factors such as coral colony conditions may contribute to the outcome of coral-algal interactions.  
81 In fact, according to the DDAM (DOC-Disease-Algae-Microbes) hypothesis, dissolved organic  
82 carbon (DOC) released by fleshy algae stimulates the growth of opportunistic microbes at the  
83 coral-algal interface (Dinsdale & Rohwer, 2011). In combination with a shift to inefficient  
84 microbial metabolic pathways, this is suggested to lead to hypoxic conditions at the coral-algal

85 interface, weakening and killing coral tissues (Haas et al., 2013; Roach et al., 2017).  
86 Simultaneously, the outcome of a competitive interaction with benthic algae depends on the  
87 relative algae overgrowth rate as well as the percentage of the coral perimeter in contact with  
88 macroalgae (Lirman, 2001). Thus, the coral perimeter and the ability to defend it must be a key  
89 factor in determining the coral-algal interaction outcome.

90 A coral colony consists of multiple clonal polyps that are connected by the coenosarc  
91 tissue. Polyps along the perimeter of the colony interact with invading non-calcifying algae as  
92 well as other benthic organisms (Jackson, 1977 & 1979; Buss & Jackson, 1979; Meesters,  
93 Wesseling & Bak, 1996). At any competitive interaction zone a coral can either overgrow (win),  
94 be overgrown (lose), or neither overgrow nor be overgrown (neutral) by the interacting species  
95 (Figure S1A) (Jackson & Winston, 1982; Barott et al., 2012b; Swierts & Vermeij, 2016).

96 Defending the perimeter requires the allocation of resources. The energy obtained from  
97 photosynthesis—carried out by endosymbiotic algae—and heterotrophic feeding (Porter, 1976)  
98 is then distributed throughout the colony using the coenosarc tissue (Rinkevich & Loya, 1989;  
99 Oren et al., 1997; Henry & Hart, 2005; Schweinsberg et al., 2015). As the colony's surface area  
100 increases so does its potential for nutrient acquisition and distribution (Oren et al., 2001). Thus,  
101 coral surface area should be another key factor in determining the coral-algal interaction  
102 outcome.

103 The resource availability hypothesis (RAH) (Endara & Coley, 2011) predicts that fast  
104 growing corals will rely on clonal growth strategies to indirectly outcompete the invading algae.  
105 This explains the resilience observed among branching corals, which invest the resources

106 acquired from their large surface areas to grow new polyps rather than to protect their small  
107 perimeters (Swierts & Vermeij, 2016). In contrast, RAH predicts that slow growing species tend  
108 to face more encounters with competitors and will invest more resources in protecting their  
109 perimeters. This has been confirmed for slow growing corals like encrusting and massive corals  
110 (Swierts & Vermeij, 2016).

111 The morphology and size of these slow growing corals have been linked to corals' natural  
112 competitive edge against most algal groups (Porter, 1976; Tanner, 1995). Massive corals have  
113 relatively lower perimeter-to-surface area ratios and demonstrate greater resilience to algal  
114 overgrowth compared to encrusting corals with large perimeter-to-surface area ratios (Hughes  
115 1989; Tanner 1995; Lirman 2001). A coral-algal survey in the Line Islands observed that small  
116 and large corals were more effective winning against algae than medium sized corals (40–80 cm)  
117 (Barott et al. 2012b). In contrast, in the South China Sea it was observed that medium size corals  
118 won more often than small and large corals (Swierts & Vermeij, 2016). Thus, the influence of  
119 the geometrical properties in the outcome of the coral-algal interaction remains unclear.

120 The accurate measurement of the perimeter and surface area in natural objects, however,  
121 is usually challenged by the presence of *fractality* (Mandelbrot, 1967, 1977, 1983). Fractals are  
122 non-smooth objects that display similar patterns across multiple scales. This makes the perimeter  
123 length and surface area to depend on the resolution of the measurement. In particular, the values  
124 follow a power law of the scale with an exponent related to the perimeter and surface's fractal  
125 dimensions, respectively, (Falconer 2003, Okie, 2013) (see Eq. (S1) in Methods). Higher fractal  
126 dimensions lead to more convoluted surfaces or perimeters with a larger number of wrinkles and

127 textures that increase the effective surface and perimeter of corals (Falconer, 2003; Okie, 2013).  
128 Previous studies found fractality among corals at different scales (Basillais, 1997; Bradbury &  
129 Reichelt, 1983; Knudby & LeDrew, 2007; Martin-Garin et al., 2007; Mark, 1984; Purkis et al.,  
130 2006; Reichert et al., 2017; Zawada & Brock, 2009), but the measurements at the coral colony  
131 scale of interest in the present study were inconclusive (Mark 1984).

132 Here we hypothesize that larger fractal dimensions and smaller perimeter-to-surface area  
133 ratios would favor corals when facing competitive interactions with algae. To characterize the  
134 fractal dimension accurately, high-resolution images of corals were necessary (Young et al.,  
135 2017), so we applied new imaging and computer rendering technologies to obtain a systematic  
136 and accurate analysis of coral geometry in the 1 mm to 1 m range.

137

## 138 **METHODS**

### 139 *Field sampling*

140 Photographs of 50 coral colonies in the Caribbean island of Curaçao were taken by  
141 SCUBA diving using a Canon Rebel T4i with a 35-mm lens and two Keldan 800 lumen video  
142 lights to illuminate the corals uniformly. An in-reef ruler was photographed to set the scale for  
143 the digital models; the ruler was placed along the interface of the coral colonies. Additionally,  
144 the perimeters of five coral colonies were measured in the field using a chain-link method, using  
145 links of sizes 1.5 cm, 5.5 cm, and 10.5 cm. See Supplementary Material for additional details.

146

### 147 *2D perimeter models and competition outcomes*

148 High-resolution, overlapping images of coral perimeters were stitched together to build a  
149 2D perimeter model (see Figures 1 and 2) using Globalmatch and Guimosrenderer software  
150 (Gracias & Santos-Victor, 2000, 2001; Lirman et al., 2007, 2010). The minimum threshold  
151 resolution was ~0.5 mm. The interaction zones were outlined in separate RGB channels using  
152 Adobe® Photoshop® CC 2014 (Figures 1 and 2): red (coral losing), green (coral winning), and  
153 blue (neutral). The fraction of red, green, and blue pixels was used, respectively, to obtain the  
154 percentage of losing (%L), winning (%W), and neutral (%N) interactions around a coral  
155 perimeter. See Supplementary Material for additional details.

156

### 157 *3D coral models*

158 Autodesk® ReMake®, 2016 was used to create 3D coral models (Burns et al., 2015;  
159 Leon et al., 2015) (Figures 1 and 2) to facilitated the accurate measurement of geometric  
160 properties of corals, e.g., perimeter, surface area, and volume at multiple scales (Naumann et al.,  
161 2009 & Lavy et al., 2015). The resolution of the models ranged from 1.6 mm to 49 mm with an  
162 average of 11 mm. See Supplementary Material for additional details.

163

### 164 *Perimeter and surface fractal dimensions*

165 The fractal dimension was calculated using a box counting method (Falconer 2003). The  
166 logarithm of the number of boxes was plotted against the logarithm of the box size, and the  
167 fractal dimension  $D$  was extracted from the slope of the linear regression using Eq. (S1) (Figure  
168 S2). The 95% confidence intervals for the fractal dimension was calculated using a Monte-Carlo

169 non-parametric bootstrap resampling method. The method was tested for the following fractal  
170 objects: the Koch curve, Sierpinski triangle, Menger sponge, and kidney vasculature. This lead to  
171 an error on the 1–3% range using five bisections (Table S1). The upper value of this range was  
172 used as the theoretical error for the fractal dimension. The perimeter fractal dimension ( $D_P$ ) was  
173 calculated from the 2D high-resolution models, which allowed a minimum of ten bisections in  
174 the algorithm. The surface fractal dimension ( $D_S$ ) was calculated from the 3D high-resolution  
175 models, which allowed a minimum of five bisections in the algorithm. The null hypotheses  $D_P \neq$   
176 1 and  $D_S \neq 2$  were evaluated using the nonparametric sign test. See Supplementary Material for  
177 additional details.

178

#### 179 *Coral geometric properties: perimeter, surface area, volume, and polyp size*

180 The perimeter, surface area, and volume of the 3D models were calculated with the mesh  
181 report tool in Autodesk® Remake®, 2016. This approach was previously tested in Naumann et  
182 al., 2009 and Lavy et al., 2015. The perimeter of the high-resolution 2D models was obtained  
183 using a Richardson algorithm. The values were compared with field values using three physical  
184 chain-links (1.5 cm, 5.5 cm, and 10.5 cm) with an errors of 14.5%, 17.5%, and 19.7%,  
185 respectively (Table S2). This discrepancy was reasonable taking into the account the projection  
186 on the model and the measurement field error. The 2D perimeter used in the analysis was  
187 obtained using a 1 mm ruler in the Richardson algorithm. Polyp diameters were also measured  
188 from the 2D models using ImageJ 1.47v and averaging 10 polyp diameters per colony. See  
189 Supplementary Material for additional details.



190

191

192 *Correlation with single variables*

193 A linear regression (least squares method) was used to compare the percentages of losing  
194 (%L) and winning (%W) perimeter with respect depth (d), polyp diameter ( $P_d$ ), volume (V),  
195 surface area (SA), surface area-to-polyp area ratio ( $SA_{polyp}$ ), perimeter fractal dimension ( $D_P$ ),  
196 surface fractal dimension ( $D_S$ ), 2D perimeter obtained from Richardson's algorithm ( $P_R$ ), 3D  
197 perimeter length ( $P_{3D}$ ), 3D perimeter-to-polyp size ratio ( $P_{polyp}$ ), 2D perimeter-to-surface area  
198 ratio ( $P_R/SA$ ), and 3D perimeter-to-surface area ratio ( $P_{3D}/SA$ ) (Table S6). The neutral  
199 interactions were a small fraction and were not studied in detail.

200

201 *Statistical learning: Random forest*

202 The package randomForest (Liaw & Wiener, 2002) was used to analyze the response of  
203 percentage of perimeter losing (%L) and winning (%W) as function of the 13 variables listed  
204 above. The package rfPermute (Archer 2016) was used to estimate the significance of  
205 importance and p-value. metrics by permuting the dependent variable, producing a null  
206 distribution of importance metrics, and calculating the p-value for each predictor variable. The  
207 initial global analysis included 13 input variables: Species, depth, polyp diameter, volume,  
208 surface area, volume to surface area ratio, surface to polyp diameter square ratio, projected  
209 perimeter length, 3D perimeter length, 3D perimeter length to polyp diameter ratio, projected  
210 perimeter to surface area ratio, 3D perimeter to surface area ratio, perimeter fractal dimension,

211 and surface fractal dimension. Both rfPermute and randomForest were run five times and  
212 averaged separately to rank the variables independently based on the mean increase accuracy  
213 error %IncMSE values. The analysis combining the top ranked variables in groups of three, and  
214 the combination leading to the largest variance explained was selected for further analysis. The  
215 hierarchical visualization of these variables was obtained using the rpart package in R (Terry  
216 2017) for %L and %W. See Supplementary Material for additional details.

217

218 *Coral geometric properties across Curaçao regions.*

219 The corals sampled (n) were grouped in three geographical regions in the island of  
220 Curaçao: East (n=9), Central (n=37), and West (n=4)—see Figure S3. The four main geometrical  
221 indicators for the percentage of losing and winning interactions (fractal surface dimension,  
222 surface area, perimeter length, and perimeter-to-surface area ratio) were compared using  
223 boxplots.

224

## 225 **RESULTS**

226 *Coral-algal competition outcomes*

227 On average, coral displayed 60% losing, 29% winning, and 11% neutral interactions  
228 along the perimeter with algae (Figures 2a and 2b, and Table S5). Among species that were  
229 sampled in five or more colonies, *S. siderea* displayed the largest percentage of losing perimeter  
230 (81%), followed by *P. strigosa* (69%), *M. cavernosa* (58%), and *O. faveolata* (56%) (Figure 2c).  
231 The species followed the inverse trend regarding the percentage of winning perimeter: *O.*

232 *faveolata* (33%), *M. cavernosa* (23%), *P. strigosa* (19%), *S. siderea* (12%). The percentage of  
233 neutral perimeter was smaller and followed a different trend: *M. cavernosa* (19%), *P. strigosa*  
234 (12%), *O. faveolata* (11%), *S. siderea* (8%). Thus, corals were generally losing, and the neutral  
235 regions represented the smallest fraction of the competitive outcomes. On average, *S. siderea*  
236 was the most vulnerable species, while *O. faveolata* was the most resilient.

237

### 238 *Coral perimeter and surface fractal dimension*

239 The perimeter fractal dimension,  $D_p$ , for the 50 corals was very close to the Euclidean  
240 value,  $D = 1$ , and it was contained within the 5% to 95% confidence interval for all corals but  
241 three (CUR34, CUR54, and CAS142) (Figure 3a). When considering the theoretical error of the  
242 box counting method (3%), these three cases were compatible with the Euclidean value: CUR34  
243 ( $D_p = 1.00 \pm 0.03$ ), CUR54 ( $D_p = 0.99 \pm 0.03$ ), and CAS142 ( $D_p = 0.99 \pm 0.03$ ). The average  
244 fractal dimension was  $\langle D_p \rangle = 0.999 \pm 0.03$  (SE), and the nonparametric sign test evaluated if the  
245 individual perimeters were non-fractal as a whole (null hypothesis,  $D \neq 1$ ), yielding a p-value of  
246 0.013. This was a conservative analysis, and incorporating the theoretical error (3%) would  
247 reduce this p-value even further. Thus, the dimensions of coral perimeters were non-fractal. The  
248 perimeters were also analyzed visually, when comparing high ( $D_p = 1.01 \pm 0.03$ ), medium ( $D_p =$   
249  $0.999 \pm 0.005$ ), and low ( $D_p = 0.988 \pm 0.008$ ) fractal dimensions ( $\pm$ SE), no salient geometric feature  
250 distinguished them (Figure 3b).

251 The surface areas and surface fractal dimensions were measured for 50 corals within the  
252 1 mm to 1 m range using the 3D coral models (Figure 3a). The 5% to 95% confidence intervals

253 included the Euclidean surface dimension,  $D=2$ , for all corals except four: CSA017 (CI: 1.94–  
254 1.98), CUR34 (CI:1.94–1.95), CUR40-2 (CI:1.90–1.94), CUR9 (CI:1.84–1.88). When  
255 considering the theoretical error of the box counting algorithm ( $\sim 3\%$ ), CSA017 ( $D_s = 1.94 \pm$   
256  $0.06$ ) and CUR34 ( $D_s = 1.94 \pm 0.06$ ) were compatible with the Euclidean value, while CUR40-2  
257 ( $D_s = 1.90 \pm 0.06$ ) and CUR9 ( $D_s = 1.86 \pm 0.06$ ) remained slightly lower. The average fractal  
258 dimension was  $\langle D_s \rangle = 2.00 \pm 0.06$  ( $\pm SE$ ) The nonparametric sign test evaluated if the coral  
259 surfaces were fractal (null hypothesis,  $D \neq 2$ ); this yielded a p-value of  $1.212e-7^{***}$  using the  
260 statistical confidence interval. This p-value would have been even smaller if the theoretical error  
261 was included. Thus, overall coral surfaces were statistically non-fractal. Figure 3c compares  
262 corals with high ( $2.08 \pm 0.04$ ), medium ( $2.01 \pm 0.04$ ), and low ( $1.90 \pm 0.03$ ) mean surface fractal  
263 dimensions. Corals with high surface fractal dimension had no holes and their surface texture  
264 was more rugose; corals with low fractal dimension instead displayed holes, peninsulas, and  
265 smoother surfaces. Thus, coral surfaces were statistically non-fractal, but the mean fractal value  
266 captured distinguishable geometrical features.

267

### 268 *Relationship between outcomes and individual geometric variables*

269 The absence of fractality in corals facilitated the measurement of the geometric properties  
270 at a single (high-resolution) scale. The percentage of losing perimeter (%L) was studied as a  
271 function of geometric and biological variables using linear regression analysis (see Figure S5 and  
272 Table S6). The percentage of losing perimeter (%L) was negatively correlated with the surface  
273 area (slope =  $8.6 \pm 4.2$   $1/\log_{10}(\text{cm}^2)$ ,  $R^2 = 0.09$ , p-value= $0.045^*$ ) and the surface fractal dimension

274 (slope =  $-145 \pm 45$ ,  $R^2 = 0.18$ , p-value = 0.0021\*\*). The opposite was observed for the percentage  
275 of winning perimeter (%W): surface area (slope =  $8.6 \pm 4.2$   $1/\log_{10}(\text{cm}^2)$ ,  $R^2 = 0.08$ , p-  
276 value=0.045\*) and surface fractal dimension (slope =  $144 \pm 45$ ,  $R^2 = 0.18$ , p-value = 0.0023\*\*).  
277 This is due to %W being negatively correlated with %L (slope =  $-0.9 \pm 0.1$ ,  $R^2 = 0.8$ , p-value =  
278  $2.2 \times 10^{-16}$ \*\*\*) (Figure S4). The percentage of neutral perimeter (%N) was discarded due to its  
279 low values (Figure 2b). Thus, two surface properties (area and fractal dimension) were directly  
280 correlated with the coral competition outcomes. The fractal dimension displayed the strongest  
281 correlation, but only captured 18 % of the variance ( $R^2 = 0.18$ ), and no variables related to the  
282 perimeter showed a direct correlation with the outcomes.

283

#### 284 *Importance of combined geometric variables in coral-algal competition outcomes*

285 The combined effect of coral geometric properties in predicting coral-algal competitive  
286 outcomes was analyzed using random forest, which estimated the average percentage increase of  
287 mean squared error  $\langle \% \text{IncMSE} \rangle$  in predicting the losing perimeter (%L) for each coral feature  
288 (see Figure S6a). The variance explained using all variables was  $4.3 \pm 0.6$  % (SE). The surface  
289 fractal dimension was the most important predictor, and the only one selected statistically against  
290 the null hypothesis by rfPermute (p-value < 0.05). The following variables—listed with  
291 decreasing importance—were the 3D perimeter, surface area, and perimeter-to-surface ratio. The  
292 lowest ranked predictor was the mean perimeter fractal dimension.

293 The top ranked variables were then combined separately and analyzed again using the  
294 random forest statistical model (Table S6). The optimal combination was surface fractal

295 dimension, 3D perimeter, and species. This explained  $18.7 \pm 0.5\%$  (SE) of the variance, and the  
296 3D perimeter ( $\langle \%IncMSE \rangle = 11.0 \pm 0.3$ ,  $p\text{-value} = 0.036^* \pm 0.009$ ) and the surface fractal  
297 dimension ( $\langle \%IncMSE \rangle = 11.0 \pm 0.4$ ,  $p\text{-value} = 0.021^* \pm 0.007$ ) were both equally important  
298 and statistically significant ( $p\text{-value} < 0.05$ ) (Figure S6a). These two variables alone, however,  
299 explained only  $\sim 8\%$  of the variance. Combinations with other geometric variables, like the  
300 perimeter-to-surface ratio, led to  $\sim 17\%$  variance explained (see Table S6). Thus, coral geometry  
301 alone explained up 17% of the percentage of losing perimeter, and the surface fractal dimension  
302 and 3D perimeter were the most relevant variables.

303 An analogous analysis was done for the %Winning outcome. Figure S6b plots the input  
304 variables ranked as a function of their average percentage increase of mean squared error  
305  $\langle \%IncMSE \rangle$ . Surface area, perimeter-to-surface area ratio, and 3D perimeter were the better-  
306 ranked variables, although only the surface area and 3D perimeter to surface area ratio had a  
307 significant p-value (0.05). The fractal surface dimension occupied a middle-ranked position,  
308 despite displaying a strong direct correlation with %W (Figure S5b); the perimeter fractal  
309 dimension was again the least relevant variable. The variance explained using all variables was  
310  $19.6\% \pm 0.9\%$  (SE). As in the %Losing case, the most relevant variables were re-analyzed  
311 separately (Table S6). The optimal combination corresponded to the 3D perimeter to surface  
312 ratio, 3D perimeter, and surface area. This explained  $26.6\% \pm 0.5\%$  of the variance. The 3D  
313 perimeter to surface area ratio ( $12.0\% \pm 0.4\%$ ,  $p\text{-value} = 0.028^* \pm 0.007$ ) and the 3D perimeter  
314 ( $10.6\% \pm 0.3\%$ ,  $p\text{-value} = 0.020^* \pm 0.004$ ) were the most important and significant variables.  
315 The surface area had a similar value but the p-value was slightly larger ( $p\text{-value} = 0.059 \pm$

316 0.010). The geometrical properties of corals explained ~25% of the variability of %Winning  
317 outcomes, and the perimeter to surface area ratio was the strongest predictor.

318

### 319 *Hierarchical analysis of coral outcomes and coral geometry*

320 To gain insight on the relationship between coral geometrical properties and coral-algal  
321 competitive outcomes, regression tree models (rpart package in R, Terry 2017) were generated  
322 using the most relevant variables selected by random forest for %L and %W (see previous  
323 sections).

324 For the percent losing case (%L), the nodes of the regression tree corresponded to the  
325 surface fractal dimension and 3D perimeter (see Figure 4a). Corals with a fractal dimension  $D_s <$   
326 2 had a higher %L and were classified on the left side of the tree. Among those, corals with 3D  
327 perimeters smaller than 318 cm formed the group with the largest percentage of losing perimeter,  
328  $\langle \%L \rangle = 79\%$ . For the group with  $D_s > 2$ , a 3D perimeter larger than 549 cm led to the cluster  
329 with the lowest percentage of losing perimeter,  $\langle \%L \rangle = 44\%$ . Figure 4a also displays the %L as  
330 a function of the 3D perimeter and surface fractal dimension. The sectors represent the regions  
331 selected by the tree. As expected, the bottom-left sector (small  $D_s$  and small perimeter) had the  
332 highest value of percentage losing perimeter, while the top-right sector (large  $D_s$  and perimeter)  
333 had the smallest percentage of losing perimeter.

334 For the percentage of winning outcome (%W), the regression tree selected the surface  
335 area (SA), 3D perimeter ( $P_{3D}$ ), and 3D perimeter to surface area ratio ( $P_{3D}/SA$ ) as the main nodes  
336 (Figure 4b). Corals with a large surface area,  $SA > 6482 \text{ cm}^2$ , had a higher %W and were

337 classified on the right side of the tree. Among those, corals with small perimeter to surface area  
338 ratios,  $P_{3D}/SA < 0.054 \text{ cm}^{-1}$ , formed the group with the largest percentage of winning perimeter,  
339  $\langle \%W \rangle = 43\%$ . On the left side of the tree, that is,  $SA < 6482 \text{ cm}^2$ , the secondary node was based  
340 on the 3D perimeter instead of the 3D perimeter to surface area ratio. Corals with large  
341 perimeters,  $P_{3D} > 141 \text{ cm}$ , formed the group with the lowest percentage of winning perimeter,  
342  $\langle \%W \rangle = 14\%$ . Figure S6b also plots the  $\%W$  as a function of the surface area and the perimeter  
343 to surface area ratio. The sectors represent the regions selected by the regression tree. As  
344 expected, the bottom-right sector (large SA and small  $P_{3D}/SA$ ) had the highest value of  
345 percentage winning perimeter, while the top-left sector (small SA and large  $P_{3D}$ ) had the smallest  
346 percentage of winning perimeter. Notice that corals with larger  $\%W$  resided in the bottom half of  
347 the scatter-plot, that is, the region with smaller perimeter to surface area ratio.

348

#### 349 *Geometric predictors at the species level*

350 The coral-algal competitive outcomes were also analyzed separately for species  
351 represented by more than five sampled colonies: *Orbicella faveolata* (n=12), *Montastraea*  
352 *cavernosa* (n=10), *Pseudodiploria strigosa* (n=8), and *Siderastrea sidereal* (n=7) (Figures S7,  
353 S8, S9, S10). For each species, the average percentage of losing perimeter ( $\%L$ ) as a function of  
354 the surface fractal dimension ( $D_s$ ) and 3D perimeter ( $P_{3D}$ ) (Figure S9) was compatible with the  
355 values obtained for the same regions in the global analysis (Figures 4a). This was also consistent  
356 for the percentage of winning perimeter (Figures S10 and 4b). Thus, the outcome averages for  
357 the regions selected in the global analysis led to equivalent results at the individual species level.



358

359 *Analysis of coral geometric properties across Curaçao regions.*

360         The corals sampled were grouped in three geographical regions: East, Central, and West  
361 (Figure S1). The four main geometrical indicators for the percentage of losing and winning  
362 interactions were compared using boxplots (Figure S11). The Central region showed the lowest  
363 value for the fractal dimension (median  $D_s < 2$ ) and surface area (Figures S8a and S8b), indicating  
364 a higher percentage of corals losing against algae. The East region displayed a relatively large  
365 surface dimension, which was comparable to the West region ( $D_s > 2$ ). Additionally, corals in the  
366 East region displayed the largest surface area of all.

367

## 368 **DISCUSSION**

369         Coral geometrical properties are involved in the acquisition of resources as well as the  
370 defense of corals against benthic algae, and in this we were interested in determining if larger  
371 fractal dimensions and smaller perimeter-to-surface area ratios were favoring corals when facing  
372 competitive interactions with algae.

373 *Relation between coral geometry and coral-algal outcomes*

374         Coral geometric properties explained 19–27% of the coral-algal interaction outcomes  
375 (Figure S6). The surface fractal dimension was instead the best single indicator for the  
376 percentage of perimeter that was losing or winning (p-value = 0.0021\*\* and  $R^2 = 0.18$ , Figure  
377 S5). This is consistent with the coral surface being essential for harvesting energy for growth and  
378 competition. To defend its perimeter, a coral colony depends on resources acquired through

379 photosynthesis (carried out by endosymbiotic algae) and heterotrophic feeding (Porter, 1976).  
380 Losing corals had lower surface fractal dimensions ( $D_s < 2$ ) and presented holes and large  
381 peninsulas, while winning corals had higher surface fractal dimensions ( $D_s > 2$ ) and displayed  
382 more compact and rugose surfaces (Figure 3c). Higher perimeter-to-surface area ratios (P/SA)  
383 were correlated with winning corals as a secondary indicator when the surface area of corals was  
384 large enough (Figures 4b).

385 The multivariate statistical analysis selected the 3D Perimeter ( $P_{3D}$ ), fractal surface  
386 dimension ( $D_s$ ), and coral species as the most relevant variables for the percentage of losing  
387 perimeter (%L) (Figure S6a). These variables combined explained 19% of the variance of  
388 outcomes—similar to the variance explained by the surface fractal dimension alone, 18% (Figure  
389 S5a). For the percentage of winning perimeter (%W), the variables selected were the 3D  
390 perimeter to surface area ratio ( $P_{3D}/SA$ ), 3D perimeter ( $P_{3D}$ ), and surface area (SA) (Figure S6b).  
391 These variables combined explained 27% of the variance (Figure S5b). Low surface fractal  
392 dimensions,  $D_s < 2$ , were a good proxy for losing corals (Figure 4a), while large surfaces with low  
393 perimeter to surface ratios favored winning corals (Figure 4b).

394

### 395 *Implications of the fractal dimensions of coral colonies*

396 Coral fractal dimensions have been used to differentiate coral species based on the  
397 structure and texture of corallites (Martin-Garin et al., 2007), characterize coral rugosity  
398 (Knudby and LeDrew, 2007), describe coral and sponge growth (Kaandorp & Kubler, 2001),  
399 measure coral mass over multiple scales (Basillais, 1997 & 1998), and distinguish functional

400 groups such as coral rubble and algal flats on large reef scales (Purkis et al., 2005, 2006; Zawada  
401 & Brock, 2009). As shown in Figure 5, the perimeter of coral colonies (range 0.5 mm to 1 m)  
402 displayed fractal dimensions close to the topological dimension,  $D \sim 1$  (current study). Larger  
403 colonies (range 0.1 m – 100 m) had slightly larger values,  $D \sim 1.2$  (Bradbury and Reichelt, 1983;  
404 Mark, 1984), and coral reefs (10 m – 5 km range) displayed values on the order of  $D \sim 1.5$  (Purkis  
405 et al., 2006). The perimeters of seagrass beds and hard ground patches were similar, suggesting  
406 that the topography of the ground may be responsible for the increment of the fractal dimension.  
407 The surface fractal dimension of corallite sections adopted  $D \sim 0.8$ – $1.0$  at the septa range 0.1 mm  
408 – 1 mm (texture) and  $D \sim 1.2$ – $1.6$  at the calicular range 1 mm – 1 cm (structure) (Martin-Garin et  
409 al., 2007). The surface of coral colonies (1 mm – 1 m range) adopted fractal dimensions around  
410 the topological value,  $D \sim 1.85$  –  $2.15$ . Coral reefs (0.5 m – 5 km range) displayed larger values  
411  $D \sim 2.28$ – $2.61$  (Zawada and Brock, 2009), which could be associated to the rugosity of the ground  
412 as in the case of the perimeter. Thus, the perimeter and surface fractal dimensions increase at  
413 larger scales.

414         At the coral colony scale, the perimeter and surface dimensions were compatible with the  
415 Euclidean dimensions,  $D = 1$  and  $D = 2$ , respectively (Figure 3). This justifies modeling coral  
416 colonies using Euclidean geometries (Meesters & Bak, 1996; Jackson, 1977; Naumann et al.,  
417 2009). The mean values of the surface fractal dimension, however, correlated with coral  
418 outcomes (Figure S5) and identified salient geometrical features. Corals with mean fractal  
419 dimensions smaller than two,  $D_s < 2$ , displayed surfaces with holes and large peninsulas, while  
420 corals with fractal dimensions larger than two,  $D_s > 2$ , displayed more compact surfaces with

421 richer and more wrinkled textures (Figure 3c). Additional geometric metrics such as rugosity,  
422 vector dispersion, multivariate multiscale fractal dimension, and multifractal analysis (Reichert  
423 et al., 2017; Young et al., 2017, Chakraborty et al., 2016) might be necessary to refine the coral  
424 geometric analysis presented here.

425         The open regions observed in corals with a surface fractal dimensions smaller than two,  
426  $D_s < 2$ , can represent more space for algae to occupy, thus leading to the DOC-Disease-Algae-  
427 Microbes (DDAM) positive feedback loop detrimental for those coral colonies (Dinsdale &  
428 Rohwer, 2011; Haas et al., 2011; Barott et al., 2012a, Roach et al., 2017). This lower fractal  
429 dimension associated to holes aligns also with the fact that corals have a limited capacity to  
430 regenerate lesions, and if they are larger than a certain size they may never be closed (Meesters  
431 et al., 1997). In fact, the sites sampled in the Central region of Curacao had a significantly lower  
432 surface fractal dimension than the East and West regions (see Figure S11). The combination of  
433 the geometrical properties and the decision trees (Figure 4) suggested that the East region is the  
434 healthiest region of Curaçao, followed by the West and Central regions. This analysis is  
435 consistent with field observations (Barrot et al. 2012c) and confirms the applicability of the  
436 geometrical analysis of corals as a proxy to assess coral-algal interactions.

437

## 438 **Conclusions and Perspectives**

439         The geometrical properties of corals explained 19% to 27% of coral-algal competition  
440 outcomes. The perimeter and surface dimensions of coral colonies were non-fractal, but the  
441 mean surface fractal dimension displayed the strongest correlation with coral-algal interaction

442 outcomes. Losing corals had low surface fractal dimensions ( $D_s < 2$ ) and displayed holes and  
443 large peninsulas, while winning corals ( $D_s > 2$ ) were more compact and displayed more rugose  
444 surfaces. Winning corals had larger surface areas with lower perimeter to surface area ratios,  
445 confirming that coral surfaces play a key energetic role in sustaining corals against algal attacks.  
446 The main geometrical predictors selected from the global analysis partitioned the percentage of  
447 losing and winning perimeters of individual species consistently. Additional data for individual  
448 species, however, will be necessary to confirm the relationship between geometrical properties  
449 and coral-algal interaction outcomes. Surveying the surface area and fractal dimensions of corals  
450 in other regions will help validate the generality of these results. Nevertheless, more  
451 sophisticated techniques such as multifractal analysis, might be necessary to understand why the  
452 surface fractal dimension is statistically non-fractal while displaying the strongest correlation  
453 discerning losing and winning corals. Additionally, it will be necessary to incorporate other  
454 descriptors that impact coral outcomes such as microbial and viral communities to achieve more  
455 accurate predictions.

456

## 457 **Acknowledgements**

458 We acknowledge Mark Hate for the original artwork that was adapted to generate the  
459 method figure about the reconstruction of 2D and 3D corals. We also thank and acknowledge the  
460 support of our funding sources. The work of Forest Rohwer and Aaron Hartmann was funded by  
461 the PIRE grant: NSF Partnerships for International Research and Education Grant (1243541). Ty  
462 N.R. Roach work was supported by the National Science Foundation (G00009988).

463

464 **Literature Cited**

- 465 1. Archer E. 2016. rfPermute: Estimate Permutation p-Values for Random Forest  
466 2. Importance Metrics. R package version 2.1.5. [https://CRAN.R-](https://CRAN.R-project.org/package=rfPermute)  
467 [project.org/package=rfPermute](https://CRAN.R-project.org/package=rfPermute)  
468  
469 3. Barott KL, Rohwer FL. 2012a. Unseen players shape benthic competition on coral reefs.  
470 Trends in Microbiology 20: 621–628.  
471  
472 4. Barott K, Williams G, Vermeij M, Harris J, Smith J, Rohwer F, Sandin S. 2012b. Natural  
473 history of coral–algae competition across a gradient of human activity in the Line Islands.  
474 Marine Ecology Progress Series 460:1–12.  
475  
476 5. Barott K, Rodriguez-Mueller B, Youle M, Marhaver KL, Vermeij M, Smith J, Rohwer F.  
477 2012c. Microbial to reef scale interactions between the reef-building coral *Montastratea*  
478 *annularis* and benthic algae. Proc. R. Soc. B 279:1655–1664.  
479  
480 6. Basillais E. 1997. Coral surfaces and fractal dimensions: a new method. Comptes rendus  
481 de l'Académie des sciences 320:653-657.  
482  
483 7. Basillais E. 1998. Functional role of the fractal morphology of corals: a full model of the  
484 nutrient turbulent diffusion fluxes to a coral reef. C. R. Acad. Sci. Paris, Sci. de la vie  
485 321, 295– 298.  
486  
487 8. Bradbury RH, Reichelt RE. 1983. Fractal dimension of a coral reef at ecological scales.  
488 Marine Ecology Progress Series 10:169-171.  
489  
490 9. Budd AF, Fukami H, Smith ND, Knowlton N. 2012. Taxonomic classification of the reef  
491 coral family Mussidae (Cnidaria: Anthozoa: Scleractinia). Zoological Journal of the  
492 Linnean Society, 166(3), 465-529.  
493 10. Burkepile, DE, Hay, ME. 2006. Herbivore vs. nutrient control of marine primary  
494 producers: context-dependent effects. Ecology 87:3128–3139.  
495  
496 11. Burns J, Delparte D, Gates, Takabayashi M. 2015. Integrating structure-from-motion  
497 photogrammetry with geospatial software as a novel technique for quantifying 3D  
498 ecological characteristics of coral reefs. PeerJ 3:e1077.  
499  
500 12. Buss LW, Jackson JBC. 1979. Competitive Networks: Nontransitive Competitive  
501 Relationships in Cryptic Coral Reef Environments.  
502

- 503 13. Chakraborty B, Vardhan YV, Haris K, Menezes A, Karisiddaiah SM, Fernandes WA,  
504 Kurian J. (2016). Multifractal detrended fluctuation analysis to compare coral bank and  
505 seafloor seepage area-related characterization along the central western continental  
506 margin of India. *IEEE Geoscience and Remote Sensing Letters*, 13: 1542–1546.  
507
- 508 14. Dinsdale EA, Rohwer F. 2011. Fish or germs? Microbial dynamics associated with  
509 changing trophic structures on coral reefs. In: Dubinsky, Z, Stambler, N, editors. *Coral*  
510 *reefs: an ecosystem in transition*. Dordrecht: Springer Verlag: 231–240.  
511
- 512 15. Endara M-J, Coley PD. 2011. The resource availability hypothesis revisited: a meta-  
513 analysis. *Functional Ecology*, 25, 389–398.  
514
- 515 16. Falconer K. 2003. *Fractal geometry: Mathematical foundations and applications*. Wiley,  
516 2<sup>nd</sup> Ed.  
517
- 518 17. Gracias N, Santos-Victor J. 2000. "Underwater video mosaics as visual navigation  
519 maps." *Computer Vision and Image Understanding* 79(1): 66-91.  
520
- 521 18. Gracias N, Santos-Victor J. 2001. Underwater mosaicing and trajectory reconstruction  
522 using global alignment. *OCEANS*, 2001. MTS/IEEE Conference and Exhibition.  
523
- 524 19. Grottoli, AG et al. 2006. Heterotrophic plasticity and resilience in bleached corals. *Nature*  
525 440, 1186 – 1189  
526
- 527 20. Haas AF, Nelson CE, Wegley-Kelly L, Carlson CA, Rohwer F, Leichter JJ, Wyatt A,  
528 Smith JE. 2011. Effects of coral reef benthic primary producers on dissolved organic  
529 carbon and microbial activity. *PLoS One* 6:e27973.  
530
- 531 21. Haas AF, Gregg AK, Smith JE, Abieri ML, Hatay M, Rohwer F. (2013). Visualization of  
532 oxygen distribution patterns caused by coral and algae. *PeerJ*, 1, e106.  
533
- 534 22. Halley JM, Hartley S, Kallimanis AS, Kunin WE, Lennon JJ, Sgardelis SP. 2004. Uses  
535 and abuses of fractal methodology in ecology. *Ecology Letters* 7:254-271.  
536
- 537 23. Henry L.A., Hart M. 2005. Regeneration from injury and resource allocation in sponges  
538 and corals—a review. *International review of hydrobiology* 90(2):125-158.  
539
- 540 24. Hughes TP. 1989. Community structure and diversity of coral reefs: the role of history.  
541 *Ecology* 70:275–279.  
542
- 543 25. Jackson JBC. 1977. Competition on marine hard substrata: the adaptive significance of  
544 solitary and colonial strategies. *American Naturalist* 11: 743–767.

- 545  
546 26. Jackson JBC. 1979. Morphological strategies of sessile animals. In Larwood, G. & B. R.  
547 Rosen (eds), *Biology and Systematics of Colonial Organisms*. Systematics Association,  
548 Special Volume 11. Academic Press, London: 499–555.  
549  
550 27. Jackson JBC, Winston JE. 1982. Ecology of cryptic coral reef communities: Distribution  
551 and abundance of major groups of encrusting organisms.  
552  
553 28. Johnston I S, Rohwer F. 2007. Microbial landscapes on the outer tissue surfaces of the  
554 reef-building coral *Porites compressa*. *Coral Reefs*, 26(2), 375-383.  
555  
556 29. Kaandorp JA, Kubler JE. 2001. *The Algorithmic Beauty of Seaweeds, Sponges and*  
557 *Corals*. Berlin: Springer-Verlag: 193.  
558  
559 30. Knudby A, LeDrew E. (2007). *Measuring Structural Complexity on Coral Reefs*.  
560  
561 31. Lavy A, Eyal G, Neal B, Keren R, Loya Y, Ilan M. (2015). A quick, easy and non-  
562 intrusive method for underwater volume and surface area evaluation of benthic organisms  
563 by 3D computer modelling. *Methods in Ecology and Evolution*, 6(5), 521-531.  
564  
565 32. Leon JX, Roelfsema CM, Saunders M, Phinn SR. 2015. Measuring coral reef terrain  
566 roughness using ‘Structure-from-Motion’ close-range photogrammetry, *Geomorphology*,  
567 242: 21-28.  
568  
569 33. Lesser MP. 2000. Depth-dependent photoacclimatization to solar ultraviolet radiation in  
570 the Caribbean coral *Montastraea faveolata*. *Marine Ecology Progress Series* 192, 137  
571  
572 34. Lesser MP, Slattery, M., Stat, M., Ojimi, M., Gates, R. D. and Grottoli, A. (2010).  
573 Photoacclimatization by the coral *Montastraea cavernosa* in the mesophotic zone: light,  
574 food, and genetics. *Ecology* 91, 990-1003.  
575  
576 35. Liaw A, Wiener M. (2002). Classification and Regression by randomForest. *R News*  
577 2(3), 18-22  
578  
579 36. Lirman D. 2001. Competition between macroalgae and corals: Effects of herbivore  
580 exclusion and increased algal biomass on coral survivorship and growth. *Coral Reefs* 6  
581 (19): 392-399.  
582  
583 37. Lirman D, et al. 2007. Development and application of a video-mosaic survey technology  
584 to document the status of coral reef communities. *Environmental Monitoring and*  
585 *Assessment* 125(1-3): 59-73.  
586



- 587 38. Lirman D, et al. 2010. Damage and recovery assessment of vessel grounding injuries on  
588 coral reef habitats by use of georeferenced landscape video mosaics. *Limnology and*  
589 *Oceanography: Methods* 8(3): 88-97.  
590
- 591 39. Madl P, Witzany G. 2014. How corals coordinate and organize: an ecosystemic analysis  
592 based on biocommunication and fractal properties. In: Witzany G (ed)  
593 *Biocommunication of animals*, Springer Science+Business Media, Dordrecht, Germany,  
594 351–382  
595
- 596 40. Mandelbrot B. 1967. How long is the coast of Britain? Statistical self-similarity and  
597 fractional dimension. *Science* 156 (3775): 636-638.  
598
- 599 41. Mandelbrot BB. (1977). *Fractals: Form, chance, and dimension*. San Francisco: Freeman.  
600 365.  
601
- 602 42. Mandelbrot BB. (1983). *The fractal geometry of nature*, (updated and augmented  
603 edition). New York: Freeman. 468.  
604
- 605 43. Martin-Garin B, Lathuiliere B, Verrecchia EP, Geister J. 2007. Use of fractal dimensions  
606 to quantify coral shape. *Coral Reefs* 26: 541–550.  
607
- 608 44. Mark D. Fractal dimension of a coral reef at ecological scales: a discussion. 1984 *Marine*  
609 *Ecology Progress Series* 14:293-294.  
610
- 611 45. McCook, L, Jompa, J, Diaz-Pulido, G. 2001. Competition between corals and algae on  
612 coral reefs: a review of evidence and mechanisms. *Coral Reefs* 19:400–417.  
613
- 614 46. Meesters EH, Wesseling I, Bak RPM. 1996. Partial mortality in three species of reef-  
615 building corals (Scleractinia) and the relation with colony morphology. *Bulletin of*  
616 *Marine Science* 58: 838-852.  
617
- 618 47. Meesters EH, Pauchli W, Bak RPM. 1997. Predicting regeneration of physical damage on  
619 a reef-building coral by regeneration capacity and lesion shape. *Mar Ecol Prog Ser* 146:  
620 91–99.  
621
- 622 48. Naumann MS, Niggli W, Laforsch C, Glaser C, Wild C. (2009). Coral surface area  
623 quantification—evaluation of established techniques by comparison with computer  
624 tomography. *Coral reefs*, 28(1), 109-117.  
625
- 626 49. Okie JG. (2013). General models for the spectra of surface area scaling strategies of cells  
627 and organisms: fractality, geometric dissimilitude, and internalization. *The American*  
628 *Naturalist*, 181(3), 421-439.

- 629  
630 50. Oren U, Rinkevich B, Loya Y. 1997. Oriented intra-colonial transport of <sup>14</sup>C labeled  
631 materials during regeneration in scleractinian corals. *Marine Ecology Progress Series*  
632 161:117–121.  
633  
634 51. Oren U, Benayahu Y, Lubinevsky H, Loya Y. 2001. Colony integration during  
635 regeneration in the stony coral *Favia fava*. *Ecology* 82:802–813.  
636  
637 52. Pandolfi JM, Jackson JBC 2006. Ecological persistence interrupted in Caribbean coral  
638 reefs. *Ecol Lett* 9: 818–826.  
639  
640 53. Perry CT, Edinger EN, Kench PS, Murphy GN, Smithers SG, Steneck RS, Mumby PJ.  
641 (2012). Estimating rates of biologically driven coral reef framework production and  
642 erosion: a new census-based carbonate budget methodology and applications to the reefs  
643 of Bonaire. *Coral Reefs*, 31(3), 853-868.  
644  
645 54. Porter JW. 1976. Autotrophy, heterotrophy, and resource partitioning in Caribbean reef-  
646 building corals. *American Naturalist* 110:731-42.  
647  
648 55. Precht WF, Aronson RB. 2006 Death and resurrection of Caribbean coral reefs: a  
649 paleoecological perspective. In *Coral reef conservation* pp. 40–77. Cambridge, UK:  
650 Cambridge University Press.  
651  
652 56. Purkis SJ, Riegl B. (2006). Fractal patterns of coral communities: evidence from remote  
653 sensing (Arabian Gulf, Dubai, UAE).  
654  
655 57. Rasher, DB, Engel, S, Bonito, V, Fraser, GJ, Montoya, JP, Hay, ME. 2012. Effects of  
656 herbivory, nutrients, and reef protection on algal proliferation and coral growth on a  
657 tropical reef. *Oecologia* 169:187–198.  
658  
659 58. Reichert J, Backers AR, Schubert P, Wilke T. 2017. The power of 3D fractal dimensions  
660 for comparative shape and structural complexity analyses of irregularly shaped  
661 organisms. *Methods Ecol Evol* 0, 1–9.  
662  
663 59. Rinkevich B, Loya Y. 1989. Reproduction in regenerating colonies of the coral  
664 *Stylophora pistillata*. Pages 257–265 in E. Spanier, Y. Stinberger, and M. Luria, editors.  
665 *Environmental quality and ecosystem stability*. Hebrew University, Jerusalem, Israel.  
666  
667 60. Roach TNF, Abieri ML, George EE, Knowles B, Naliboff DS, Smurthwaite CA, Wegley-  
668 Kelly L, Haas AF, Rohwer FL. 2017. Microbial bioenergetics of coral-algal interactions.  
669 *PeerJ* 5:e3423.  
670

- 671 61. Silveira, CB, Silva-Lima, AW, Francini-Filho, RB, Marques, JSM, Almeida, MG,  
672 Thompson, CC, Rezende, CE, Paranhos, R, Moura, RL, Salomong, PS, Thompson, FL.  
673 2015. Microbial and sponge loops modify fish production in phase-shifting coral reefs.  
674 *Environ Microbiol* 17:3832–3846.
- 675 62. Smith, JE, Hunter, CL, and Smith, CM. 2010. The effects of top-down versus bottom-up  
676 control on benthic coral reef community structure. *Oecologia* 163:497–507.
- 677
- 678 63. Sebens KP. 1982. Competition for space: Growth rate, reproductive output, and escape in  
679 size.
- 680
- 681 64. Schweinsberg M, Weiss LC, Striewski S, Tollrian R, Lampert KP. 2015. More than one  
682 genotype: how common is intracolony genetic variability in scleractinian corals?  
683 *Molecular Ecology* (11):2673-85.
- 684
- 685 65. Swierts T, Vermeij MJ. (2016). Competitive interactions between corals and turf algae  
686 depend on coral colony form. *PeerJ* 4:e1984 <https://doi.org/10.7717/peerj.1984>
- 687
- 688 66. Tanner JE. 1995. Competition between scleractinian corals and macroalgae: an  
689 experimental investigation of coral growth, survival and reproduction. *Journal of*  
690 *Experimental Marine Biology and Ecology* 190:151–168.
- 691
- 692 67. Terry T, Atkinson B, and Ripley B. (2017). rpart: Reursive partitioning and regression  
693 trees. R package version 4.1-11. <https://CRAN.R-project.org/package=rpart>
- 694
- 695 68. Zawada DG, Brock JC. (2009). A multiscale analysis of coral reef topographic  
696 complexity using lidar-derived bathymetry. *Journal of Coastal Research*, 6-15.
- 697
- 698 69. Young GC, Dey S, Rogers AD, Exton D. (2017). Cost and time-effective method for  
699 multiscale measures of rugosity, fractal dimension, and vector dispersion from coral reef  
700 3D models. *PLoS One* 124: e0175341.
- 701

702 **Figures**

703

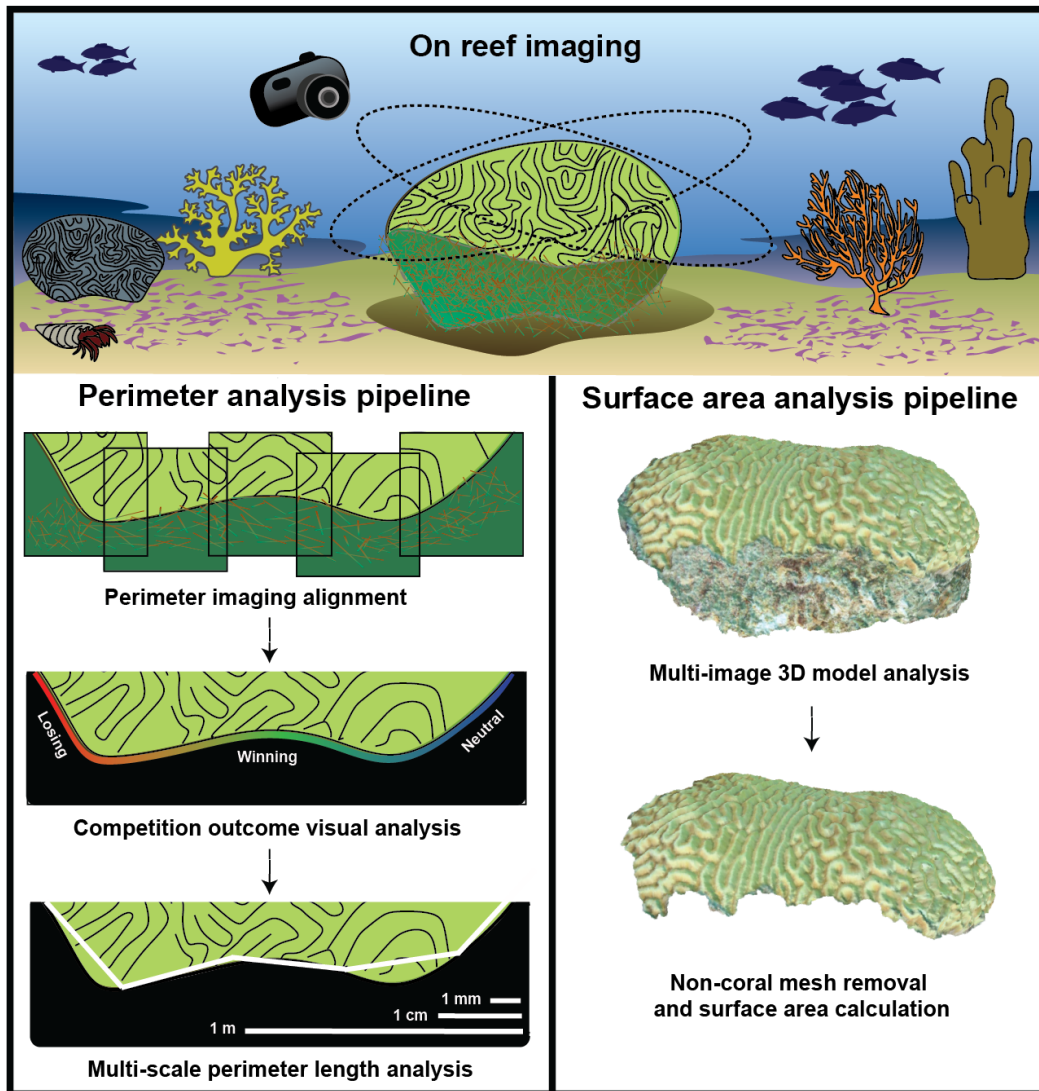

704

705 **Figure 1. Coral geometry methods** (Top panel) Corals were photographed from different angles and distances.  
706 (Bottom left panel) Close range pictures were stitched together to generate a high-resolution 2D perimeter model.  
707 The interactions along the coral perimeter were outlined and the perimeter lengths were measured over a 0.1 mm to  
708 1 m scale range. (Bottom right panel) Farther range pictures were processed to create the 3D coral models. Models  
709 were calibrated with an in-reef reference; non-coral mesh was removed to measure the coral surface area.

710

711

**a) 2D and 3D representative models for increasing percentage of losing perimeter**

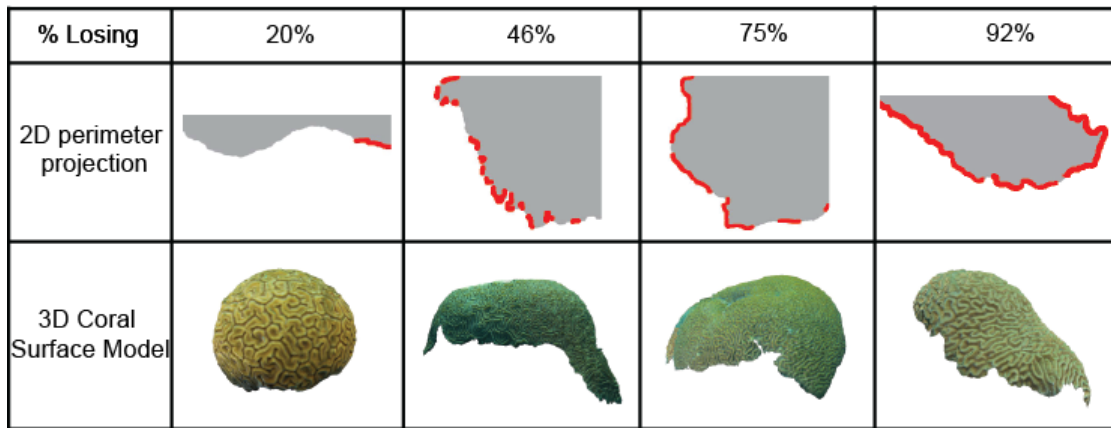

**b) Statistics for the competitive outcomes**

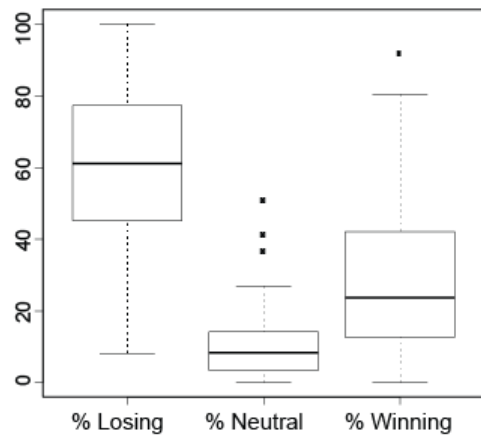

**c) Competitive outcomes across species**

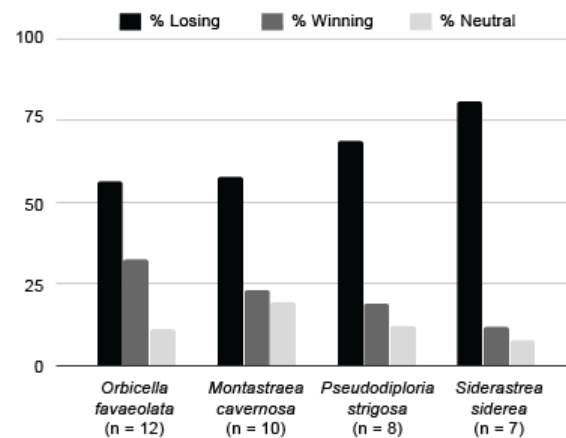

712

713 **Figure 2. Coral models and statistics for competitive outcomes.** a) 2D and 3D coral models for different  
 714 percentages of losing perimeter (%L). The 2D models highlight the losing regions in red. b) Box plot for the three  
 715 perimeter outcomes: losing (%L), neutral (%N), and winning (%W). The middle line corresponds to the median, the  
 716 range of the box contains from the 25<sup>th</sup> to the 75<sup>th</sup> percentile, and each whisker is the minimum (in absolute value)  
 717 between the 150% interquartile range (IQR) and the value of the most extreme point in that side of median. Outliers  
 718 exceeding the whiskers are included (Table S5). b) Competitive outcomes for species that were sampled in five or  
 719 more colonies. The bars correspond to the average percentage of losing perimeter (black), average percentage of  
 720 winning perimeter (dark grey), and average percentage of neutral perimeter (light grey).

721

722

## Coral Fractal Dimensions

### a) Perimeter and surface fractal dimensions

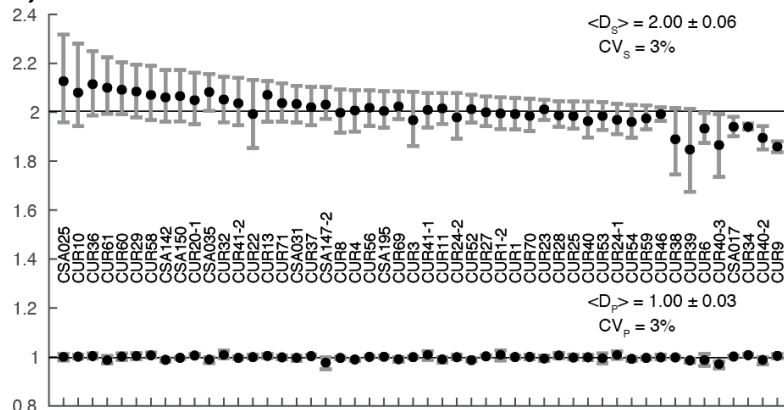

### b) Fractal perimeter representatives

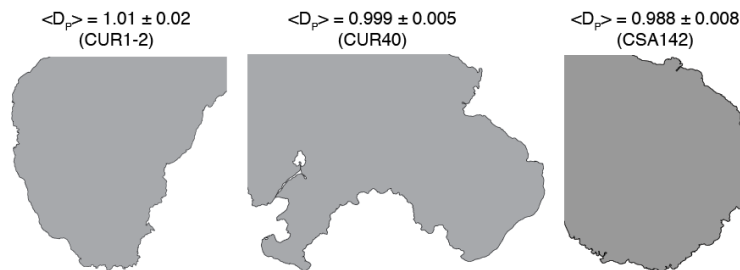

### c) Fractal surface representatives

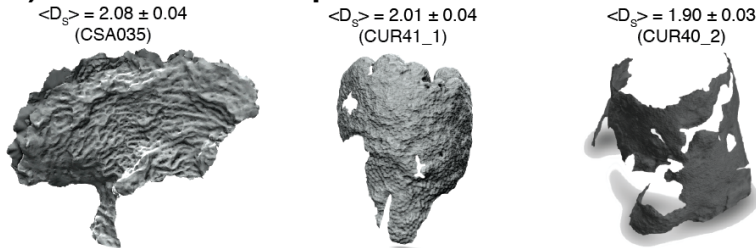

723

724 **Figure 3. Coral fractal dimensions.** a) Surface fractal dimensions (top) and perimeter fractal dimensions (bottom)  
 725 for all specimens reconstructed digitally. The plot includes the mean (black dot), 5 to 95% confidence intervals  
 726 (whiskers), and the label associated to each coral. A solid line provides a reference for the topological dimensions:  $D$   
 727 = 1 (perimeter) and  $D=2$  (surface). The plot includes also the mean values for the fractal dimension of the perimeter  
 728 ( $\langle D_p \rangle$ ) and the surface ( $\langle D_s \rangle$ ) ( $\pm$  standard deviation) and their respective coefficients of variation ( $CV = \text{standard}$   
 729 deviation / mean \* 100). Panels b) and c) display coral representatives associated with high, medium, and low fractal  
 730 dimension for the perimeter (b) and the surface (c).

731

732

### Interdependence of Optimal Variables in the Prediction of Outcomes

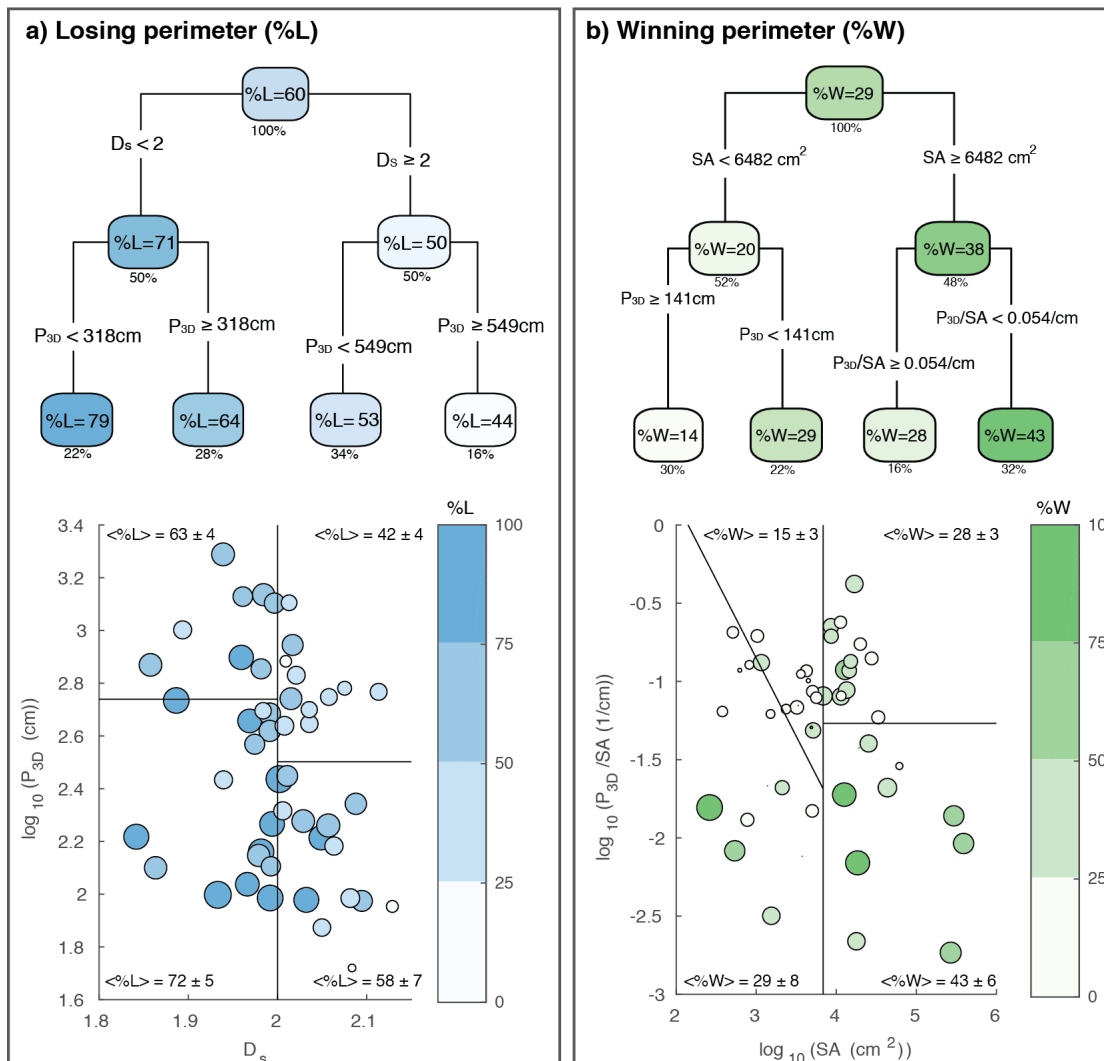

733  
734  
735  
736  
737  
738  
739  
740  
741

**Figure 4. Interdependence of optimal variables in the predictions of outcomes.** a) A regression tree (top panel) generated for the percentage losing perimeter (%L) including the selected variables in the refined Random Forest analysis (Figure S6). Each cluster displays the average outcome. The value below the box indicates the percentage of data contained in the cluster. The bottom panel plots %L as a function of the 3D Perimeter and fractal surface dimension. The shades of blue and circle sizes are proportional to the level of %L. b) The two panels are analogous to a) but using the percentage of winning perimeter (%W) as an output variable. The percentage of winning is in this case proportional to the intensity of green.

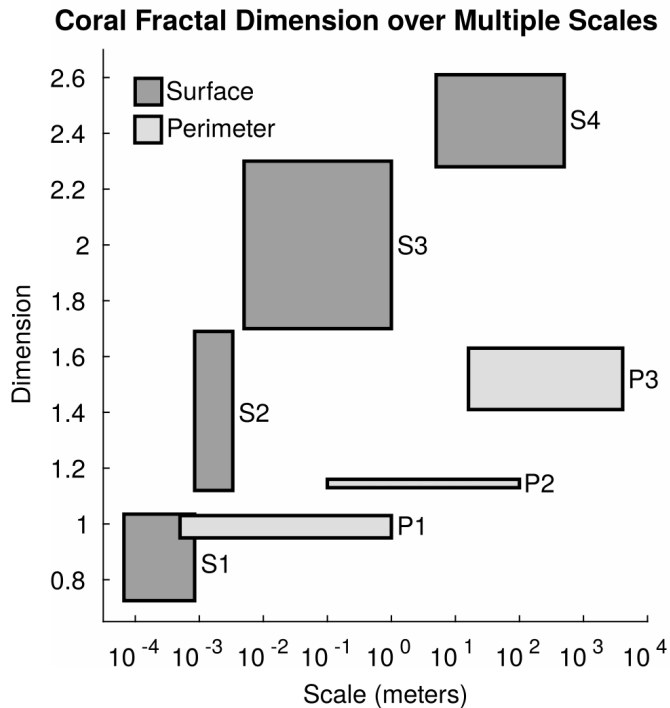

742

743 **Figure 5. Coral fractal dimension over multiple scales.** The chart plots the ranges of fractal dimensions measured  
744 across scales for different coral studies. The fractal dimensions are grouped in two categories: Surface fractal  
745 dimension (dark grey) and perimeter fractal dimension (light grey). For the perimeter, the ranges correspond to coral  
746 colonies (P1; current study), larger coral colonies (P2; Bradbury & Rachel, 1983; Mark, 1984), and coral reefs (P3;  
747 Purkis et al., 2006). For the surface, the ranges correspond to corallite texture (S1; Martin-Garin et al., 2007),  
748 corallite structure (S2; Martin-Garin et al., 2007), coral colonies (S3; current study), and coral reefs (S4; Zawada et  
749 al., 2009).

750
